# Supplementary material
Source: publisher figshare collection journal article supplement (https://acs.figshare.com/ndownloader/files/8851387)
Supplement: Supplementary file 1 [file 8851387]

## Supporting Information

### The Effect of Fluorine Substitution on the Molecular Interactions and Performance in Polymer Solar Cells

In-Bok Kim<sup>a</sup>, Soo-Young Jang<sup>b,c</sup>, Yeong-A Kim<sup>c</sup>, Rira Kang<sup>d</sup>, In-Sik Kim<sup>e</sup>, Do-Kyeong Ko<sup>e</sup>, Dong-Yu Kim<sup>a,c\*</sup>

<sup>a</sup>Research Institute for Solar and Sustainable Energies (RISE), Gwangju Institute of Science and Technology (GIST), 123 Cheomdangwagi-ro, Buk-gu, Gwangju, 61002, Republic of Korea

<sup>b</sup>Department of Chemistry and Centre for Plastic Electronics, Imperial College London, Exhibition Rd, London, SW7 2AZ, UK.

<sup>c</sup>Heeger Center for Advanced Materials (HCAM), School of Material Science and Engineering (SMSE), Gwangju Institute of Science and Technology (GIST), 123 Cheomdangwagi-ro, Buk-gu, Gwangju, 61002, Republic of Korea.

<sup>d</sup>Radiation Research Division for Industry and Environment, Korea Atomic Energy Research Institute (KAERI), 29 Geungu-gil, Jeongeup-si, Jeollabuk-do, 56212, Republic of Korea

<sup>e</sup>School of Physics and Chemistry, Gwangju Institute of Science and Technology (GIST), 123 Cheomdangwagi-ro, Buk-gu, Gwangju, 61002, Republic of Korea

Corresponding author: Dong-Yu Kim

\*E-mail: kimdy@gist.ac.kr

## Synthesis of Monomers

The monomers were prepared by modifying the previously reported literatures.<sup>1,2,3</sup>

4,7-Bis(4-dodecylthiophen-2-yl)-2,1,3-benzothiadiazole (2-1). 2-Tributylstannyl-4-octyldodecylthiophene (4.3 g, 8.4 mmol), 4,7-dibromo-[2,1,3]benzothiadiazole (1-1, 0.816 g, 2.8 mmol), Pd<sub>2</sub>(dba)<sub>3</sub> (25 mg), and P(o-tolyl)<sub>3</sub> (17 mg) were dissolved in 25 mL of anhydrous toluene. The solution was degassed and refluxed 2 days. After cooling to room temperature, the mixture was extracted three times with CH<sub>2</sub>Cl<sub>2</sub>. The combined CH<sub>2</sub>Cl<sub>2</sub> extraction was dried over anhydrous MgSO<sub>4</sub>. The solvent was removed under reduced pressure and the residue was purified by column chromatography on silica gel using hexane as eluent. The desired product was obtained as a yellow solid (1.56 g). <sup>1</sup>H NMR (400 MHz, CDCl<sub>3</sub>) δ 7.94 (s, 2H), 7.83 (s, 2H), 7.0 (s, 2H), 2.57 (d, 4 H), 1.75 (s, 2H), 1.5-1.15 (br, 60 H), 0.86 (m, 12 H). Elemental Anal. Calcd. For (C<sub>54</sub>H<sub>88</sub>N<sub>2</sub>S<sub>3</sub>): C, 75.29; H, 10.30; N, 3.25; S, 11.16. Found: C, 75.30; H, 10.38; N, 3.21; S, 11.09.

4,7-Bis(4-dodecylthiophen-2-yl)-5-Fluoro-2,1,3-benzothiadiazole (2-2). The compound (2-2) was synthesized by following similar procedure of compound (2-1). <sup>1</sup>H NMR (400 MHz, CDCl<sub>3</sub>) δ 8.00 (d, 2 H), 7.73 (d, 1 H), 7.08 (d, 2 H), 2.63 (t, 4 H), 1.68 (s, 2 H), 1.4-1.1 (br, 60 H), 0.86 (m, 12 H). Elemental Anal. Calcd. For (C<sub>54</sub>H<sub>87</sub>FN<sub>2</sub>S<sub>3</sub>): C, 73.75; H, 9.97; F, 2.16; N, 3.19; S, 10.94. Found: C, 73.56; H, 9.95; N, 3.25; S, 10.88.

4,7-Bis(4-dodecylthiophen-2-yl)-5,6-difluoro-2,1,3-benzothiadiazole (2-3). The compound (2-3) was synthesized by following similar procedure of compound (2-1). <sup>1</sup>H NMR (400 MHz, CDCl<sub>3</sub>) δ 8.09 (s, 2 H), 7.17 (s, 2 H), 2.64 (t, 4 H), 1.68 (s, 2 H), 1.38-1.11 (br, 60 H), 0.86 (m, 12 H). Elemental Anal. Calcd. For (C<sub>54</sub>H<sub>86</sub>F<sub>2</sub>N<sub>2</sub>S<sub>3</sub>): C, 72.27; H, 9.66; F, 4.23; N, 3.12; S, 10.72. Found: C, 72.96; H, 10.21; N, 2.41; S, 10.35.

4,7-Bis(5-bromo-4-dodecylthiophen-2-yl)-2,1,3-benzothiadiazole (3-1). NBS (0.65 g, 3.64 mmol) was added in small portions to a solution of compound (2-1) (1.56 g, 1.82 mmol) in 60

mL of  $\text{CHCl}_3$ . The reaction mixture was stirred in the dark at room temperature overnight. The mixture was poured into water and extracted three times with  $\text{CHCl}_3$ . The combined  $\text{CHCl}_3$  was dried over  $\text{MgSO}_4$ . Solvent was removed under reduced pressure and the residue was purified by chromatography using hexane/chloroform as an eluent. The desired product was obtained as a red solid (1.6 g). MALDI TOF: 1057.0.  $^1\text{H}$  NMR (400 MHz,  $\text{CDCl}_3$ )  $\delta$  7.73 (s, 2 H), 2.57 (d, 4 H), 1.75 (s, 2H), 1.5-1.15 (br, 60 H), 0.86 (m, 12 H). Elemental Anal. Calcd. For ( $\text{C}_{54}\text{H}_{86}\text{Br}_2\text{N}_2\text{S}_3$ ): C, 63.63; H, 8.50; Br, 15.68; N, 2.75; S, 9.44. Found: C, 63.85; H, 8.42; N, 2.81; S, 9.69.

4,7-Bis(5-bromo-4-dodecylthiophen-2-yl)-5-fluoro-2,1,3-benzothiadiazole (3-2). The compound (3-2) was synthesized by following similar procedure of compound (3-1). MALDI TOF: 1036.5.  $^1\text{H}$  NMR (400 MHz,  $\text{CDCl}_3$ )  $\delta$  7.78 (d, 2 H), 7.58 (d, 1 H), 2.55 (t, 4 H), 1.73 (s, 2 H), 1.4-1.1 (br, 60 H), 0.86 (m, 12 H) Elemental Anal. Calcd. For ( $\text{C}_{54}\text{H}_{85}\text{Br}_2\text{FN}_2\text{S}_3$ ): C, 62.53; H, 8.26; Br, 15.41; F, 1.83; N, 2.70; S, 9.27. Found: C, 62.85; H, 8.28; N, 2.73; S, 9.36.

4,7-Bis(5-bromo-4-dodecylthiophen-2-yl)-5,6-difluoro-2,1,3-benzothiadiazole (3-3). The compound (3-2) was synthesized by following similar procedure of compound (3-1). MALDI TOF: 1018.4.  $^1\text{H}$  NMR (400 MHz,  $\text{CDCl}_3$ )  $\delta$  7.93 (s, 2 H), 2.58 (t, 4 H), 1.74 (s, 2 H), 1.41-1.11 (br, 60 H), 0.85 (m, 12 H). Elemental Anal. Calcd. For ( $\text{C}_{54}\text{H}_{84}\text{Br}_2\text{F}_2\text{N}_2\text{S}_3$ ): C, 61.46; H, 8.02; Br, 15.14; F, 3.60; N, 2.65; S, 9.11. Found: C, 61.66; H, 7.99; N, 2.66; S, 9.16.

2,6-Bis(tri-methylstannyl)-dithieno[3,2-b:2',3'-d]thiophene (5). 100 ml two neck round bottom flask was prepared with 2,6-dibromodithieno[3,2-b:2',3'-d]thiophene (4) (1.0 g, 2.8 mmol) and purged with nitrogen. Distilled THF (40 ml) was added to the flask and cooled to  $-80\text{ }^\circ\text{C}$ . After 1 hour, a solution of n-BuLi in hexane (4.2 ml, 6.72 mol, 1.6 M) was added dropwise. The white solid was precipitated and stirred at  $-80\text{ }^\circ\text{C}$  for 1 hour and at room temperature for 1 hour. The mixture was cooled again to  $-40\text{ }^\circ\text{C}$  and trimethyltin chloride (8.4 ml, 1 M in THF) was added in one portion. The mixture was stirred at  $-40\text{ }^\circ\text{C}$  for 1 hour, then let it warm to room

temperature. After the mixture was warmed to room temperature, the mixture was quenched with the water and stirred for 30 min and removing THF. The mixture was washed with water ( $2 \times 100$  ml), extracted with hexane ( $2 \times 100$  ml), and dried over  $\text{MgSO}_4$ . After removing solvent, to the residue was recrystallized using acetonitrile. GC/MS:  $m/z$  ( $M^+$ ) = 522,  $^1\text{H}$  NMR (400 MHz,  $\text{CDCl}_3$ )  $\delta$  7.28 (s, 2H), 0.38 (t, 18 H), Elemental Anal. Calcd. For ( $\text{C}_{14}\text{H}_{20}\text{S}_3\text{Sn}_2$ ): C, 32.22; H, 3.86; S, 18.43. Found: C, 32.38; H, 3.88; S, 18.36.

## Reference

1. J. Frey, S. Proemmel, M. A. Armitage, A. B. Homes, *Org. Synth.*, 2006, **11**, 843-849.
2. T.-H. Kwon, V. Armel, A. Nattestad, D. R. MacFarlane, U. Bach, S. J. Lind, K. C. Gordon, W. Tang, D. J. Jones, A. B. Homes, *J. Org. Chem.*, 2011, **76**, 4088-4093.
3. Y. Zhang, S.-C. Chien, K.-S. Chen, H.-L. Yip, Y. Sun, J. A. Davies, F.-C. Chenb, A. K.-Y. Jen, *Chem. Commun.*, 2011, **47**, 11026-11028.

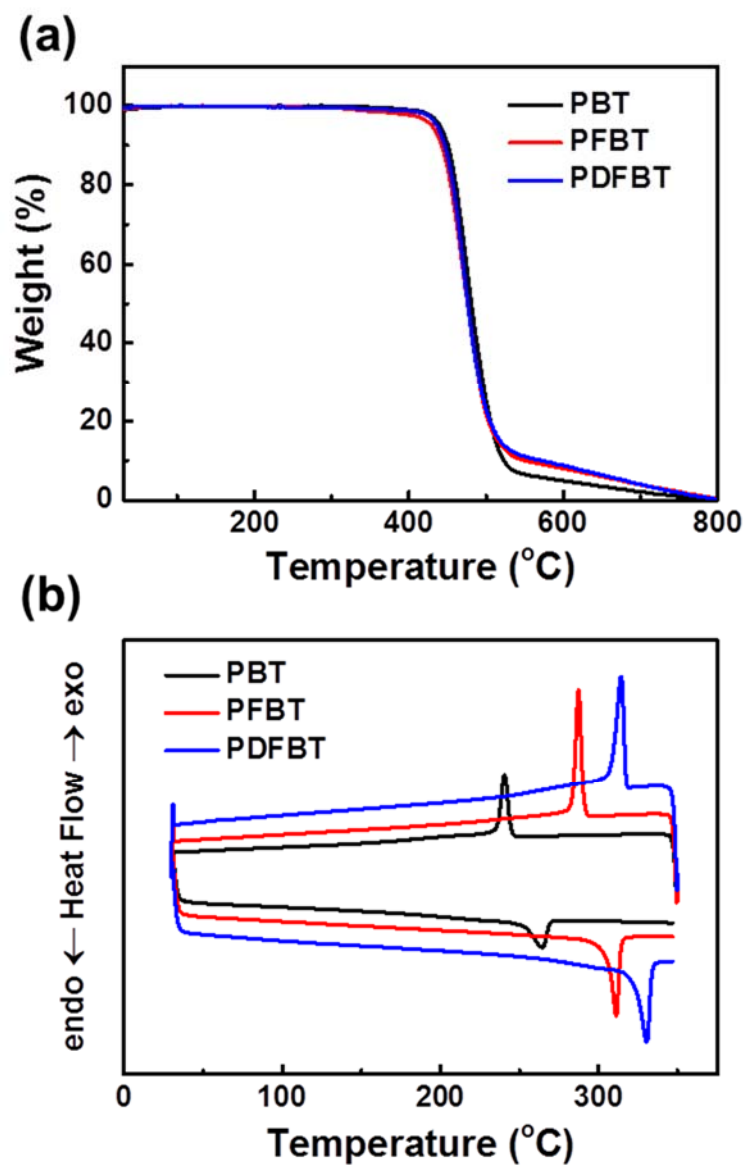

**Figure S1.** (a) Thermogravimetric analysis (TGA) and (b) differential scanning calorimetry (DSC) thermograms of PBT, PFBT and PDFBT.

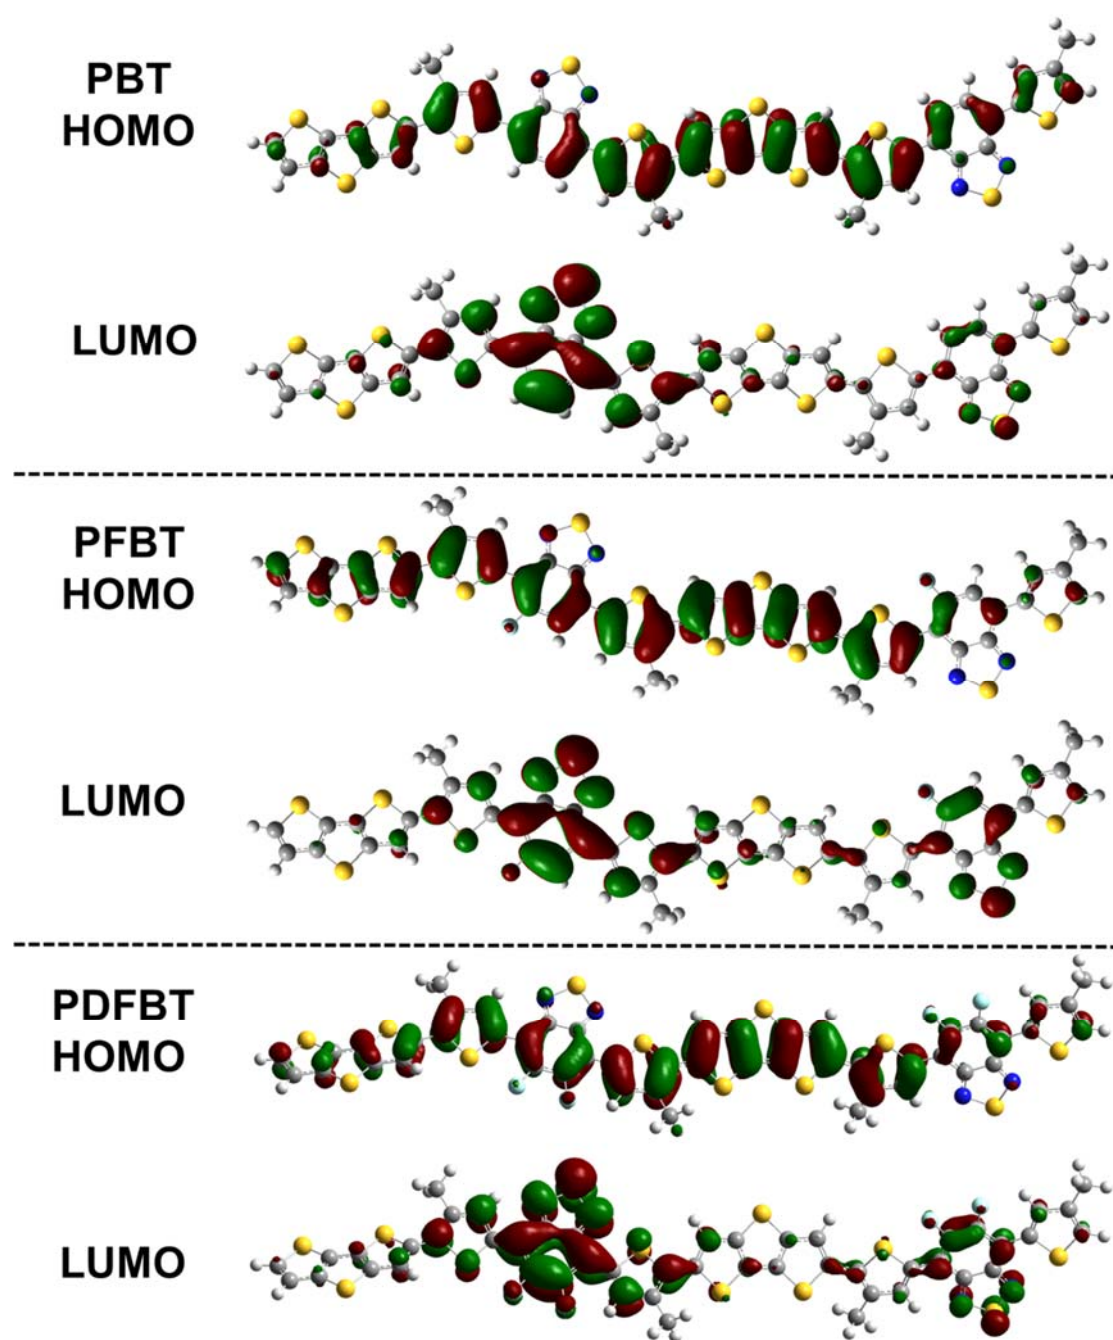

**Figure S2.** Electronic structure of polymers simulated by Density Functional Theory (DFT).

**Table S1.** Torsion angles and energy level of dimers for PBT, PFBT and PDFBT calculated by DFT.

| Polymer | $\theta_1$<br>(Deg) | $\theta_2$<br>(Deg) | Bond<br>length<br>(pm) | $\Delta$ Length<br>(pm) <sup>a</sup> | HOMO<br>(eV) | LUMO<br>(eV) |
|---------|---------------------|---------------------|------------------------|--------------------------------------|--------------|--------------|
| PBT     | 32                  | 6.4                 | 145.87                 | -                                    | -5.04        | -2.99        |
| PFBT    | 31                  | 0.6                 | 145.71                 | -0.16                                | -5.07        | -3.06        |
| PDFBT   | 30                  | 1.6                 | 145.68                 | -0.19                                | -5.15        | -3.10        |

<sup>a</sup>  $\Delta$  Length was calculated by the difference between the bond length of PBT and that of others.

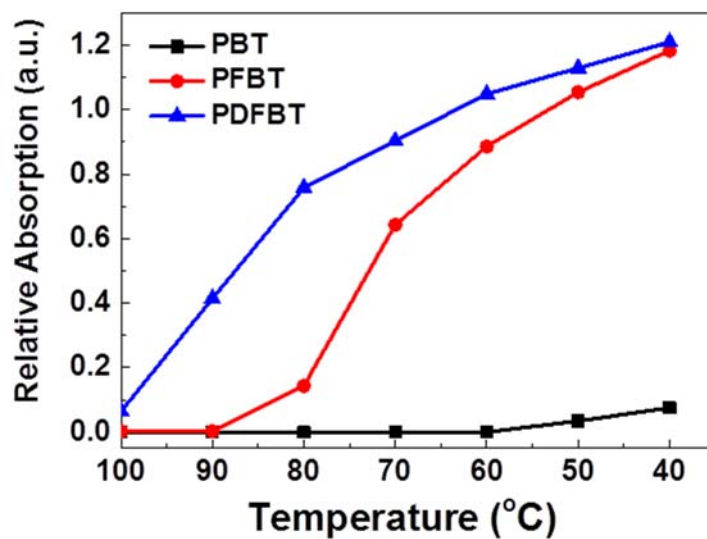

**Figure S3.** Relative absorption at various solution temperatures of PBT, PFBT and PDFBT. Relative absorption means the relative intensity of the absorption peak at 700 nm with a maximum peak at 150 °C.



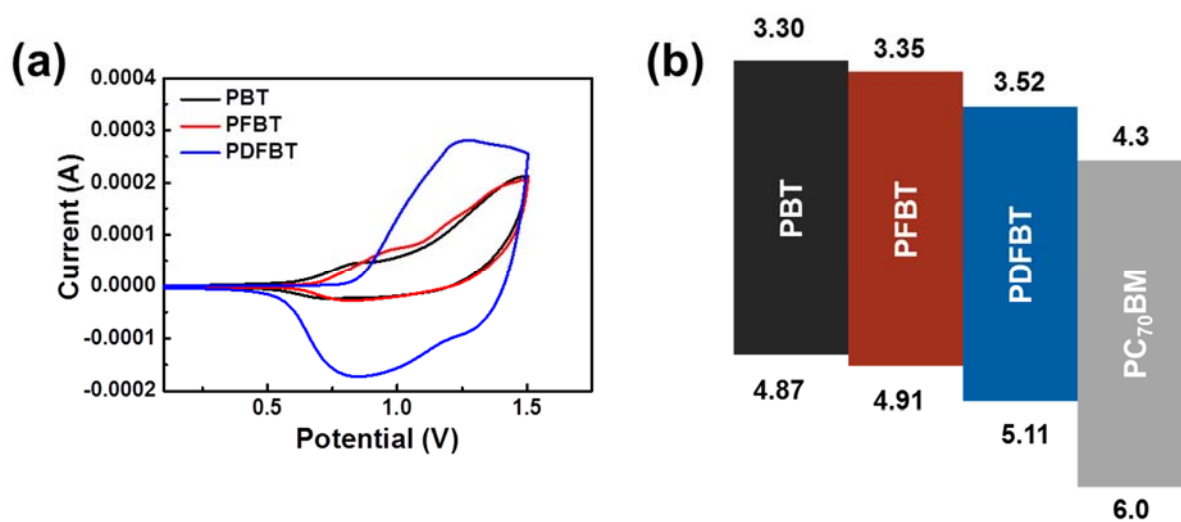

**Figure S4.** (a) Cyclic voltammogram of PBT, PFBT and PDFBT in Bu<sub>4</sub>NClO<sub>4</sub>/acetonitrile at a scan rate of 50 mVs<sup>-1</sup> and (b) energy band diagram.

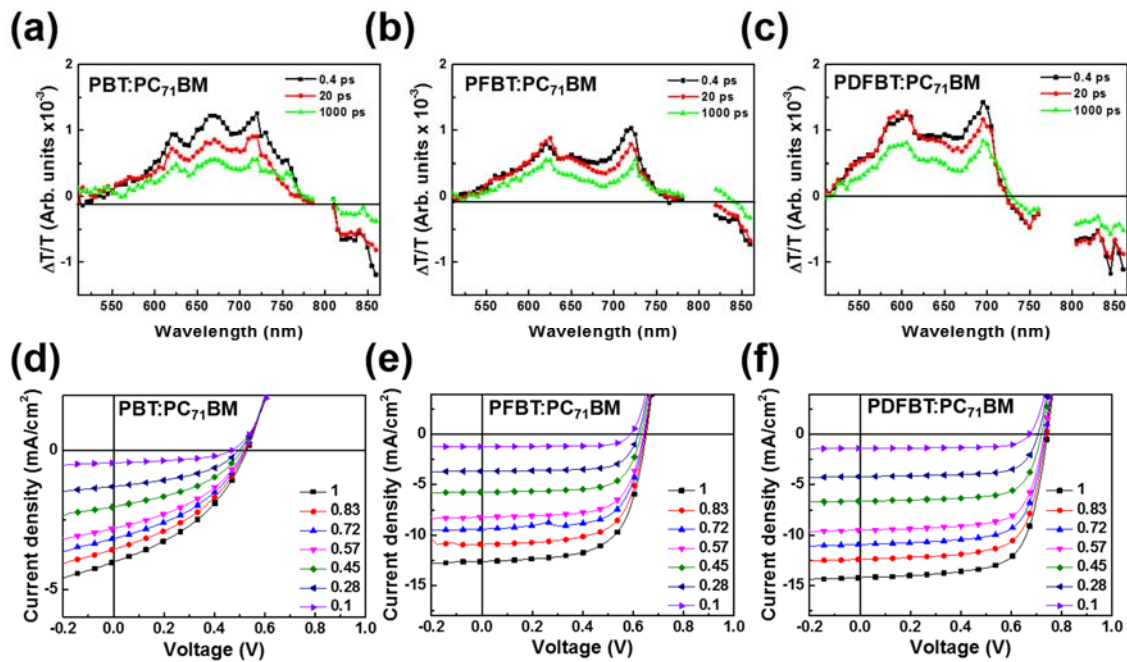

**Figure S5.** TA spectra of (a) PBT:PC<sub>71</sub>BM, (b) PFBT:PC<sub>71</sub>BM and (c) PDFBT:PC<sub>71</sub>BM films measured at several time delays. J-V characteristics of (d) PBT:PC<sub>71</sub>BM, (e) PFBT:PC<sub>71</sub>BM and (f) PDFBT:PC<sub>71</sub>BM solar cells under various incident light intensities.

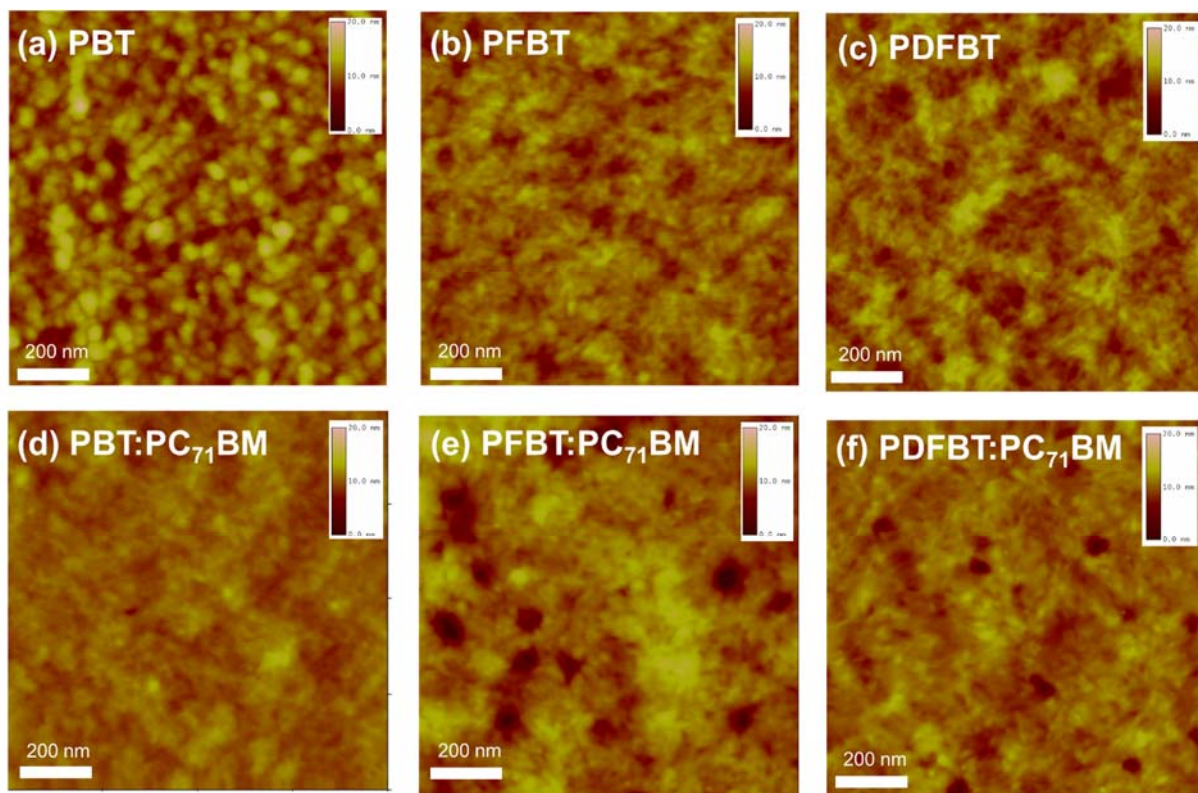

**Figure S6.** Height images of atomic force microscopy (AFM) for (a) PBT, (b) PFBT, (c) PDFBT, (d) PBT:PC<sub>71</sub>BM, (e) PFBT:PC<sub>71</sub>BM and (f) PDFBT:PC<sub>71</sub>BM, respectively.
